# Supplementary material for: Seasonality of the Airborne Ambient Soot Predominant Emission Sources Determined by Raman Microspectroscopy and Thermo-Optical Method
Source: MDPI journal article supplement (doi:10.3390/atmos12060768), 2021-06-14
Supplement: s1 [file s1]

Supplementary Materials:

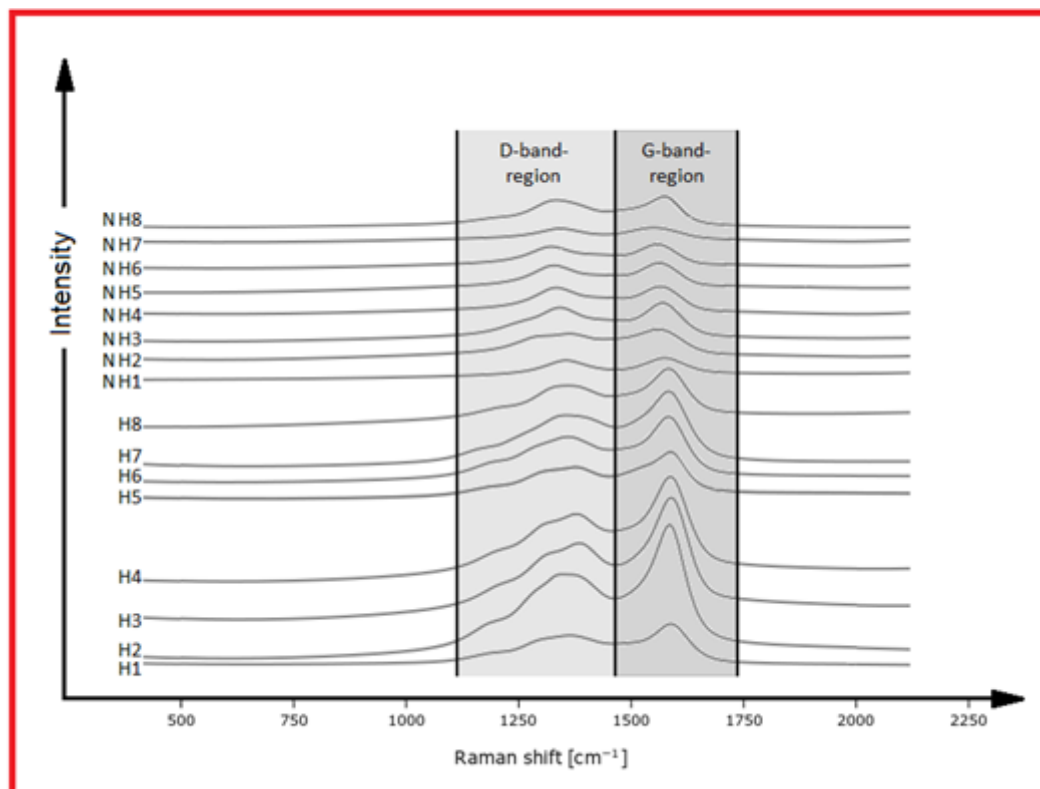

Figure S1: Raman spectra of soot in PM<sub>2.5</sub> collected in Racibórz during heating (H) and non-heating (NH) seasons.

**Table S1.** EUSAAR-2 temperature protocol used in thermal-optical-transmittance analysis.

| Gas               | Temperature [°C] | Duration [s] |
|-------------------|------------------|--------------|
| He                | 200              | 120          |
| He                | 300              | 150          |
| He                | 450              | 180          |
| He                | 650              | 180          |
| He/O <sub>2</sub> | 500              | 120          |
| He/O <sub>2</sub> | 550              | 120          |
| He/O <sub>2</sub> | 700              | 70           |
| He/O <sub>2</sub> | 850              | 80           |

**Table S2.** Mass concentrations ( $\mu\text{g m}^{-3}$ ) of PM<sub>2.5</sub>, thermo-optically determined organic carbon (OC) and elemental carbon (EC), together with their thermally evolved fractions (OC1-4 and EC1-4), total carbon (TC), and a pyrolyzed carbon fraction (PC) in samples of ambient soot from Racibórz collected during heating (H) and non-heating (NH) seasons.

| Sample:<br>sampling date | PM <sub>2.5</sub> | OC    | EC   | TC    | OC1  | OC2  | OC3  | OC4  | PC    | EC1  | EC2   | EC3   | EC4  |
|--------------------------|-------------------|-------|------|-------|------|------|------|------|-------|------|-------|-------|------|
| H1: 1.18.17              | 65                | 24.77 | 3.88 | 28.65 | 4.31 | 3.88 | 1.76 | 1.97 | 12.85 | 2.53 | 6.83  | 7.20  | 0.17 |
| H2: 1.20.17              | 116               | 53.16 | 5.94 | 59.10 | 8.46 | 9.86 | 4.37 | 2.56 | 27.91 | 4.15 | 9.34  | 20.13 | 0.23 |
| H3: 1.26.17              | 110               | 47.48 | 7.08 | 54.56 | 7.37 | 9.45 | 3.86 | 2.80 | 24.00 | 4.03 | 10.15 | 16.73 | 0.18 |
| H4: 2.01.17              | 119               | 47.27 | 5.34 | 52.61 | 6.67 | 7.10 | 3.32 | 2.51 | 27.67 | 4.16 | 9.65  | 19.06 | 0.14 |
| H5: 2.05.17              | 80                | 37.85 | 4.78 | 42.63 | 6.92 | 9.26 | 3.09 | 2.44 | 16.14 | 3.27 | 8.10  | 9.44  | 0.11 |
| H6: 2.09.17              | 65                | 26.74 | 4.27 | 31.01 | 4.72 | 4.59 | 1.97 | 2.71 | 12.76 | 2.56 | 7.07  | 7.24  | 0.16 |
| H7: 2.13.17              | 91                | 40.71 | 6.82 | 47.53 | 6.37 | 6.57 | 3.14 | 2.99 | 21.64 | 3.55 | 9.60  | 15.01 | 0.31 |
| H8: 2.19.17              | 78                | 21.78 | 4.24 | 26.02 | 3.62 | 3.64 | 1.63 | 2.33 | 10.56 | 2.03 | 4.79  | 7.88  | 0.10 |
| NH1: 6.9.17              | 10                | 3.05  | 0.57 | 3.62  | 0.44 | 0.75 | 0.51 | 0.81 | 0.55  | 0.08 | 0.26  | 0.55  | 0.23 |
| NH2: 6.25.17             | 15                | 4.05  | 0.38 | 4.43  | 0.59 | 1.16 | 0.66 | 0.89 | 0.75  | 0.15 | 0.38  | 0.44  | 0.16 |
| NH3: 6.27.17             | 15                | 3.43  | 0.69 | 4.12  | 0.52 | 0.82 | 0.55 | 0.92 | 0.62  | 0.12 | 0.32  | 0.67  | 0.20 |
| NH4: 6.29.17             | 11                | 2.08  | 0.26 | 2.34  | 0.34 | 0.58 | 0.41 | 0.58 | 0.18  | 0.02 | 0.07  | 0.18  | 0.17 |
| NH5: 7.1.17              | 7                 | 1.78  | 0.18 | 1.96  | 0.33 | 0.50 | 0.33 | 0.45 | 0.18  | 0.03 | 0.08  | 0.14  | 0.11 |
| NH6: 7.3.17              | 9                 | 1.69  | 0.21 | 1.90  | 0.31 | 0.48 | 0.31 | 0.48 | 0.11  | 0.01 | 0.06  | 0.14  | 0.12 |
| NH7: 7.5.17              | 13                | 2.75  | 0.47 | 3.22  | 0.35 | 0.65 | 0.46 | 0.74 | 0.56  | 0.14 | 0.28  | 0.41  | 0.19 |
| NH8: 7.11.17             | 10                | 2.34  | 0.34 | 2.68  | 0.36 | 0.62 | 0.42 | 0.64 | 0.31  | 0.05 | 0.16  | 0.28  | 0.16 |

**Table S3.** Raman parameters obtained from the deconvolution of D and G bands in the spectra of soot collected during heating and non-heating seasons in Racibórz.  $D_{STA}$  and  $G_{STA}$  – scaled integrated area of D and G bands (standard deviation in parentheses);  $D_{STA}/G_{STA}$  – area ratio; D and G bands shifts at maximum intensity ( $cm^{-1}$ );  $I_D/I_G$  – maximum height ratio;  $FWHM_G$  – G-band full width at half maximum ( $cm^{-1}$ ); RAR – Raman area ratio; and  $D1_A/G_A$  – D1 and G area ratio.

| Samples:<br>sampling dates | $D_{STA}$ | $G_{STA}$ | $D_{STA}/G_{STA}$ | D    | G    | $I_D/I_G$ | $FWHM_G$ | RAR  | $D1_A/G_A$ |
|----------------------------|-----------|-----------|-------------------|------|------|-----------|----------|------|------------|
| H1: 1.18.17                | 281(30)   | 199(27)   | 1.41              | 1372 | 1596 | 0.72      | 92       | 3.93 | 0.57       |
| H2: 1.20.17                | 288(14)   | 177(13)   | 1.63              | 1375 | 1593 | 0.61      | 82       | 4.02 | 0.58       |
| H3: 1.26.17                | 286(18)   | 170(19)   | 1.68              | 1399 | 1596 | 0.59      | 82       | 2.61 | 0.96       |
| H4: 1.27.17                | 287(17)   | 178(13)   | 1.62              | 1381 | 1599 | 0.63      | 88       | 2.51 | 0.83       |
| H5: 2. 5.17                | 288(25)   | 197(33)   | 1.46              | 1377 | 1601 | 0.69      | 76       | 2.84 | 1.08       |
| H6: 2. 9.17                | 277(33)   | 188(08)   | 1.47              | 1374 | 1595 | 0.68      | 90       | 3.55 | 0.62       |
| H7: 2.13.17                | 295(19)   | 197(27)   | 1.49              | 1359 | 1595 | 0.68      | 96       | 3.52 | 0.63       |
| H8: 2.19.17                | 267(17)   | 180(07)   | 1.49              | 1365 | 1599 | 0.68      | 90       | 2.10 | 0.88       |
| NH1: 6.9.17                | 192(04)   | 174(01)   | 1.10              | 1346 | 1604 | 0.84      | 52       | 0.79 | 1.27       |
| NH2: 6.25.17               | 231(39)   | 199(17)   | 1.16              | 1362 | 1589 | 0.85      | 43       | 1.46 | 1.31       |
| NH3: 6.27.17               | 256(12)   | 207(06)   | 1.23              | 1335 | 1592 | 0.77      | 55       | 1.97 | 1.06       |
| NH4: 6.29.17               | 194(05)   | 171(04)   | 1.14              | 1344 | 1586 | 0.77      | 40       | 0.81 | 1.96       |
| NH5: 7. 1.17               | 199(05)   | 183(03)   | 1.08              | 1353 | 1598 | 0.98      | 47       | 0.80 | 1.80       |
| NH6: 7. 3.17               | 197(03)   | 178(09)   | 1.10              | 1341 | 1589 | 0.89      | 46       | 0.79 | 1.77       |
| NH7: 7. 5.17               | 198(08)   | 175(05)   | 1.14              | 1347 | 1589 | 0.89      | 46       | 0.80 | 1.75       |
| NH8: 7.11.17               | 194(04)   | 174(08)   | 1.11              | 1384 | 1599 | 0.91      | 60       | 0.74 | 1.35       |

**Table S4.** Nonparametric (Spearman) correlation matrix ( $\alpha = 0.05$ ) for  $I_D/I_G$  and concentrations of OC, EC (including their thermally evolved components), TC, pyrolytic product (Pyr), and  $PM_{2.5}$  ( $\mu g \cdot m^{-3}$ ) calculated for the entire sampling period, and separately for the heating and non-heating seasons. Bold-typed values refer to the statistically significant correlation.

| Entire sampling period |              |              |              |              |              |              |              |              |              |              |              |              |              |
|------------------------|--------------|--------------|--------------|--------------|--------------|--------------|--------------|--------------|--------------|--------------|--------------|--------------|--------------|
|                        | OC           | EC           | TC           | OC1          | OC2          | OC3          | OC4          | Pyr          | EC1          | EC2          | EC3          | EC4          | $PM_{2.5}$   |
| $I_D/I_G$              | <b>-0.91</b> | <b>-0.92</b> | <b>-0.91</b> | <b>-0.89</b> | <b>-0.89</b> | <b>-0.91</b> | <b>-0.90</b> | <b>-0.87</b> | <b>-0.86</b> | <b>-0.87</b> | <b>-0.92</b> | -0.20        | <b>-0.92</b> |
| Heating season         |              |              |              |              |              |              |              |              |              |              |              |              |              |
| $I_D/I_G$              | <b>-0.78</b> | <b>-0.76</b> | <b>-0.78</b> | -0.63        | -0.63        | <b>-0.78</b> | -0.59        | -0.66        | <b>-0.71</b> | <b>-0.71</b> | <b>-0.81</b> | -0.34        | <b>-0.78</b> |
| Non-heating season     |              |              |              |              |              |              |              |              |              |              |              |              |              |
| $I_D/I_G$              | -0.48        | -0.60        | -0.48        | -0.45        | -0.48        | -0.48        | -0.62        | -0.26        | -0.14        | -0.26        | -0.55        | <b>-0.71</b> | -0.6         |
